# Supplementary material
Source: PubMed Central journal article supplement (PMC4349983)

# Supplemental Figure 1A

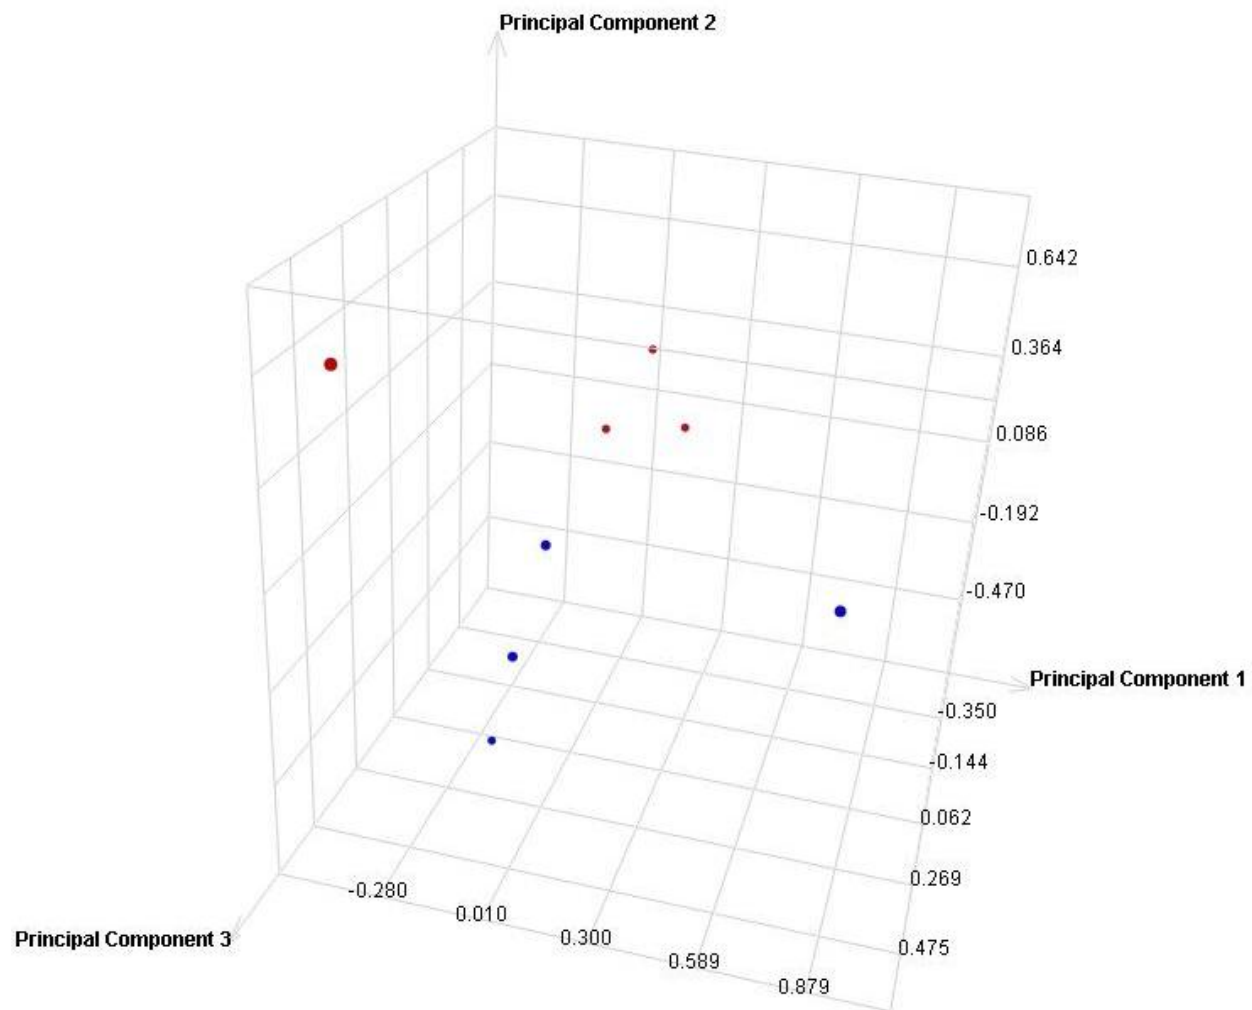

Supplemental Figure 1B

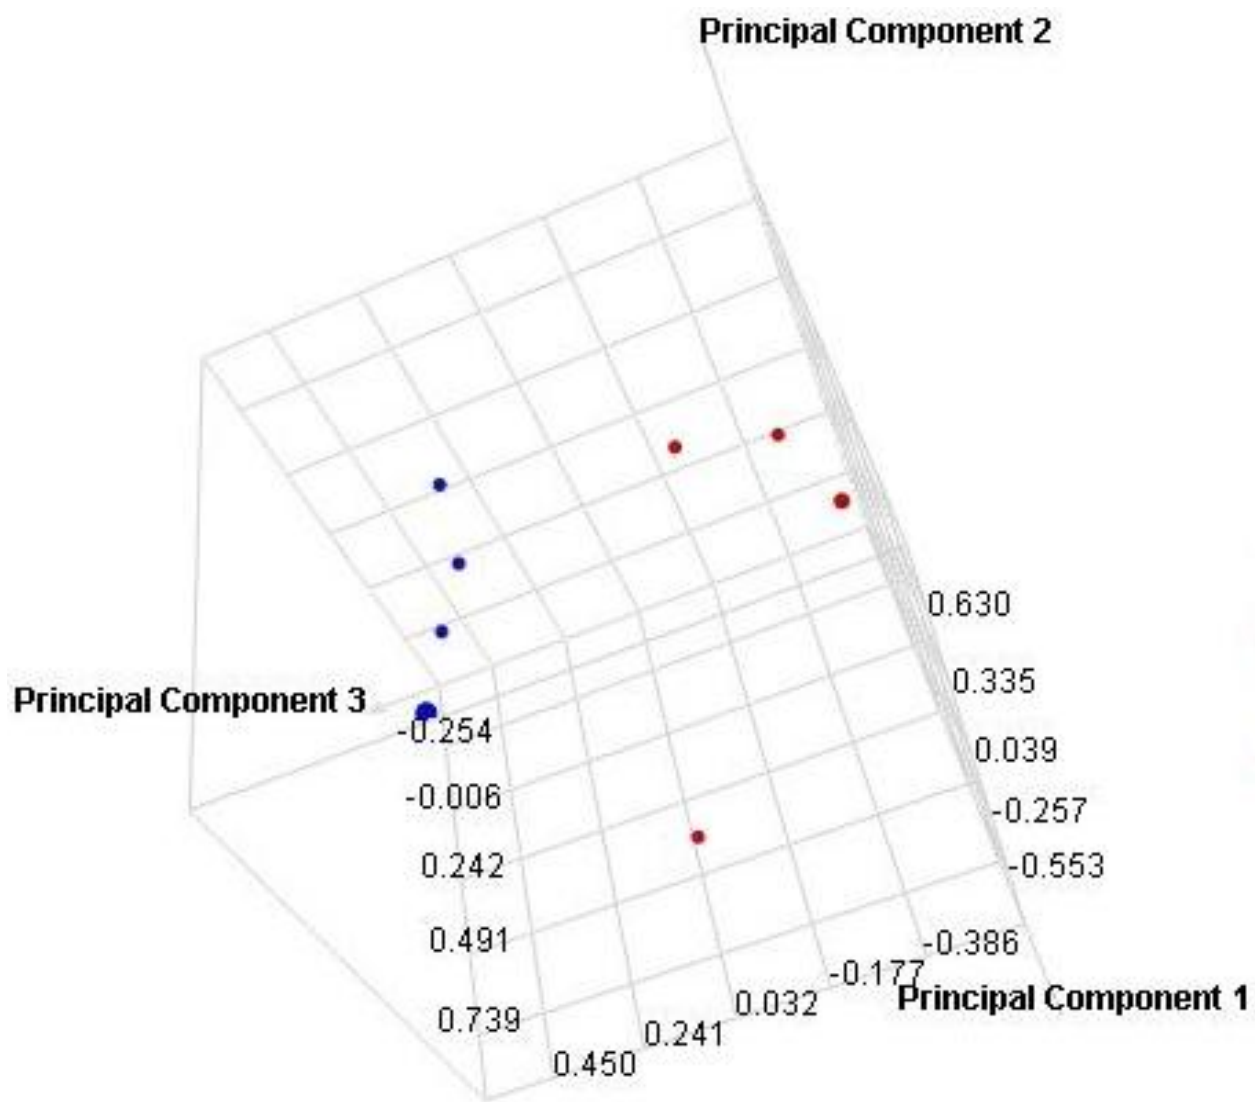

Supplement: supp_M114.041863_mcp.M114.041863-2.pdf [file supp_M114.041863_mcp.M114.041863-2.pdf]
